# Supplementary material for: Precisely controlled preparation of an advanced Na3V2(PO4)2O2F cathode material for sodium ion batteries: the optimization of electrochemical properties and electrode kinetics
Source: Royal Society of Chemistry journal article supplement (doi:10.1039/c8qi01374h), 2019-01-01
Supplement: c8qi01374h1.pdf [file c8qi01374h1.pdf]

*Electronic Supplementary Information (ESI) for*

**Precisely-controlled preparation of the advanced  
Na<sub>3</sub>V<sub>2</sub>(PO<sub>4</sub>)<sub>2</sub>O<sub>2</sub>F cathode material for sodium ion batteries: the  
optimization of electrochemical properties and electrode kinetics**

*Zhen-Yi Gu<sup>ac</sup>, Jin-Zhi Guo<sup>b</sup>, Yang Yang<sup>b</sup>, Hai-Yue Yu<sup>b</sup>, Xiao-Tong Xi<sup>b</sup>, Xin-Xin Zhao<sup>b</sup>, Hong-Yu Guan<sup>\*d</sup>, Xiaoyan He<sup>\*c</sup> and Xing-Long Wu<sup>\*ab</sup>*

*<sup>a</sup> Key Laboratory for UV Light-Emitting Materials and Technology of Ministry of Education, Northeast Normal University, Changchun, Jilin 130024, P. R. China, E-mail: xinglong@nenu.edu.cn*

*<sup>b</sup> National & Local United Engineering Laboratory for Power Batteries, Department of Chemistry, Northeast Normal University, Changchun, Jilin 130024, P. R. China*

*<sup>c</sup> College of Chemistry and Environmental Science, Yili Normal University, Yining, Xinjiang 835000, P. R. China, E-mail: hexy856@sina.com*

*<sup>d</sup> School of Chemistry and Chemical Engineering, Guangzhou University, Guangzhou 510006, China, E-mail: guanhy@nenu.edu.cn*

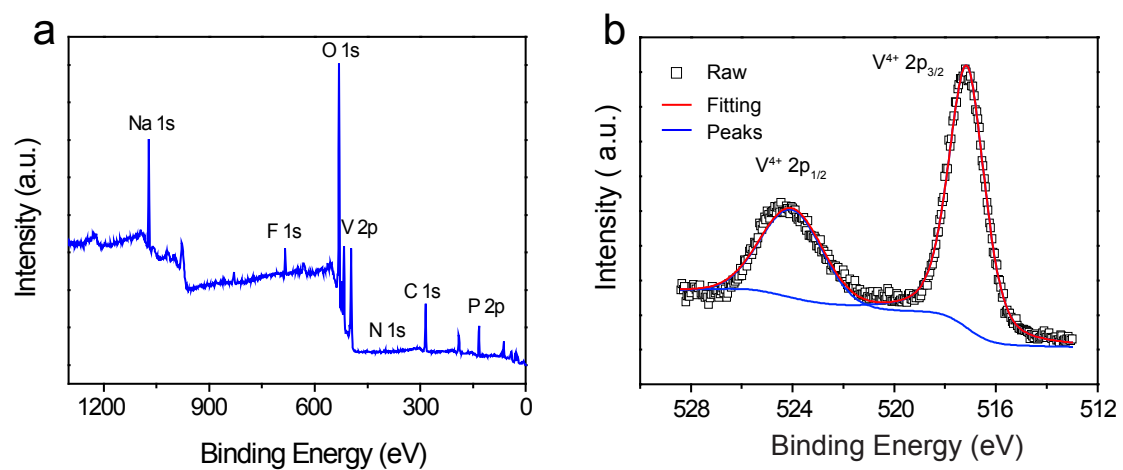

**Figure S1.** XPS spectrum of the optimally prepared NVPOF under 170 °C at pH = 7: (a) the overall and (b) high-resolution V2p spectra.

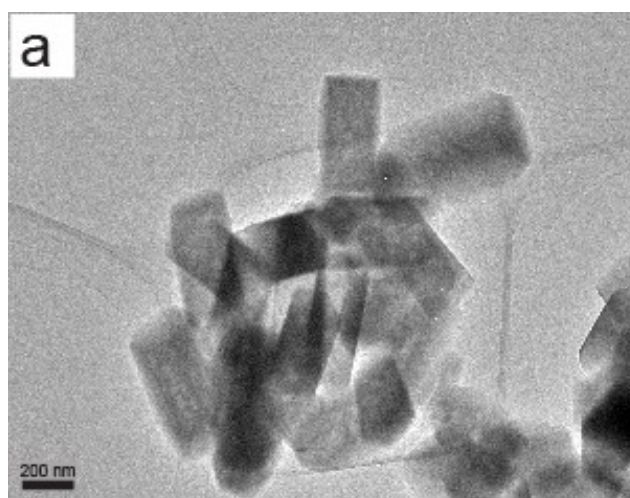

**Figure S2.** TEM images of the NVPOF materials prepared at 170 °C under pH=7.

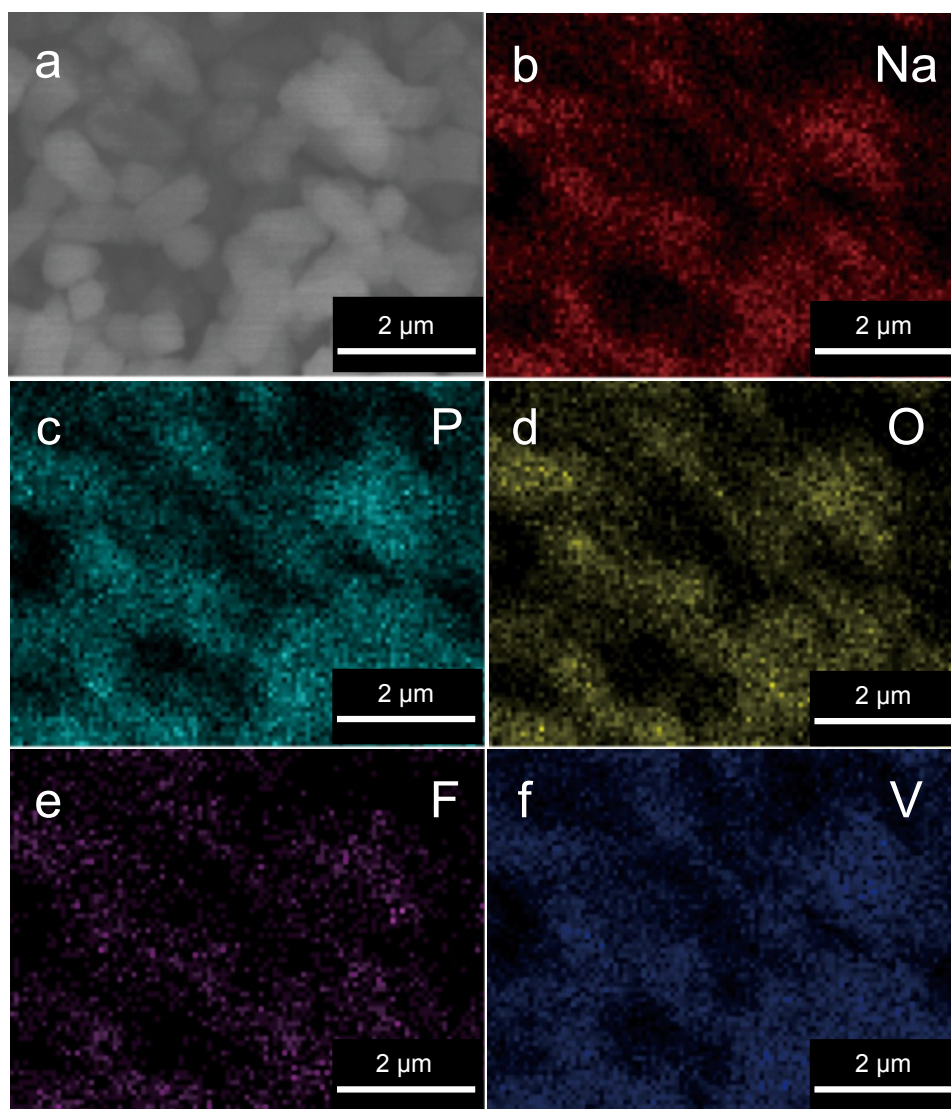

**Figure S3.** SEM image and the corresponding elemental mappings of the NVPOF material prepared at pH = 7 under 170 °C.

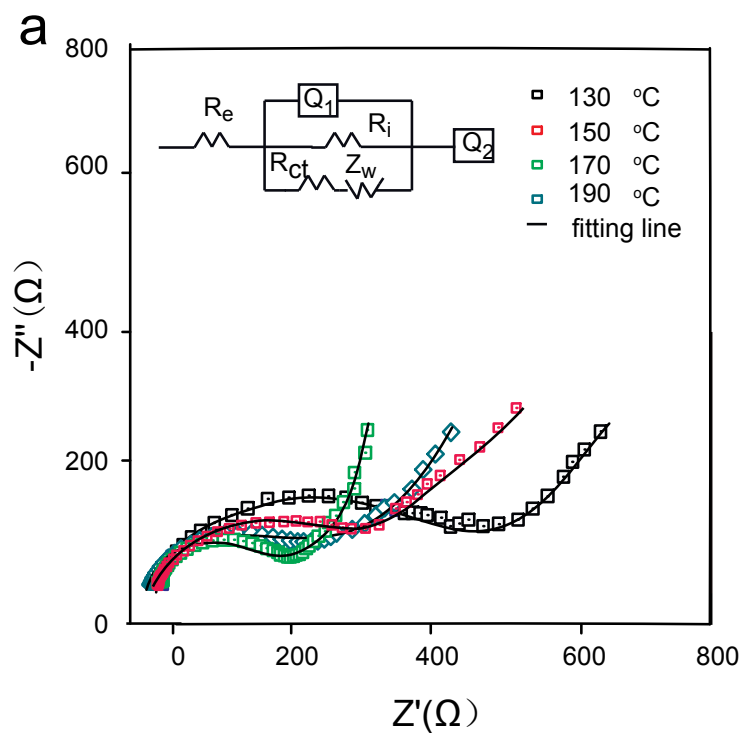

**Figure S4.** The impedance spectra (1 MHz ~ 10 mHz) of NVPOF at different temperatures and equivalent circuit used for curve fitting.

**Table S1** Impedance parameters derived by using equivalent circuit model of the NVPOF materials prepared under different temperature

| T/°C | $R_s/\Omega$ | $R_{ct}/\Omega$ |
|------|--------------|-----------------|
| 130  | 7.48         | 565             |
| 150  | 6.81         | 383             |
| 170  | 3.56         | 205             |
| 190  | 4.36         | 232             |

**Table S2** Comparison of NVPOF materials from our work with previously reported ones of phosphate-based cathode materials for Na-ion batteries.

| Materials                                                                         | Synthesis methods      | Electrochemical activity                                                        | Ref       |
|-----------------------------------------------------------------------------------|------------------------|---------------------------------------------------------------------------------|-----------|
| Na <sub>3</sub> V <sub>2</sub> (PO <sub>4</sub> ) <sub>3</sub>                    | Solid-state reaction   | 116.5 mA h g <sup>-1</sup> 3.4 V ( $Q_{Th} = 117$ mA h g <sup>-1</sup> )        | [1]       |
| NaVPO <sub>4</sub> F                                                              | Solid-state reaction   | 82 mA h g <sup>-1</sup> , 3.7 V ( $Q_{Th} = 142.6$ mA h g <sup>-1</sup> )       | [2]       |
| NaV <sub>1-x</sub> Cr <sub>x</sub> PO <sub>4</sub> F                              | Solid-state reaction   | 83.3 mA h g <sup>-1</sup> , 3–4.5 V ( $Q_{Th} = 142.6$ mA h g <sup>-1</sup> )   | [3]       |
| Na <sub>3</sub> V <sub>2</sub> (PO <sub>4</sub> ) <sub>2</sub> F <sub>3</sub>     | Carbothermal reduction | 111.6 mAh g <sup>-1</sup> , 2.5–4.6 V ( $Q_{Th} = 128.2$ mA h g <sup>-1</sup> ) | [4]       |
| Na <sub>3</sub> Ti <sub>2</sub> (PO <sub>4</sub> )F <sub>3</sub>                  | Solid-state reaction   | 57.7 mA h g <sup>-1</sup> , 1.5–3.5 V ( $Q_{Th} = 132.8$ mA h g <sup>-1</sup> ) | [4]       |
| Na <sub>1.5</sub> VO(PO <sub>4</sub> ) <sub>2</sub> F                             | Hydrothermal           | 100 mA h g <sup>-1</sup> , 3.6–4 V ( $Q_{Th} = 156$ mA h g <sup>-1</sup> )      | [5]       |
| Na <sub>3</sub> V <sub>2</sub> O <sub>2</sub> (PO <sub>4</sub> ) <sub>2</sub> F-G | Solvothermal           | 120 mA h g <sup>-1</sup> , 2.5–4.5 V ( $Q_{Th} = 122.4$ mA h g <sup>-1</sup> )  | [6]       |
| Na <sub>2</sub> FePO <sub>4</sub> F                                               | Solid-state reaction   | 110 mA h g <sup>-1</sup> , 2–3.8 V ( $Q_{Th} = 124.2$ mA h g <sup>-1</sup> )    | [7]       |
| Na <sub>2</sub> MnPO <sub>4</sub> F                                               | Solid-state reaction   | 100 mA h g <sup>-1</sup> , 3.4 V ( $Q_{Th} = 124.7$ mA h g <sup>-1</sup> )      | [8]       |
| Na <sub>2</sub> CoPO <sub>4</sub> F                                               | Solid-state reaction   | 100 mA h g <sup>-1</sup> , 4.3 V ( $Q_{Th} = 122.4$ mA h g <sup>-1</sup> )      | [9]       |
| NaFeSO <sub>4</sub> F                                                             | Solid-state synthesis  | 6 mA h g <sup>-1</sup> , 3.5 V ( $Q_{Th} = 138$ mA h g <sup>-1</sup> )          | [10]      |
| Na <sub>3</sub> V <sub>2</sub> O <sub>2</sub> (PO <sub>4</sub> ) <sub>2</sub> F   | Hydrothermal           | 123 mA h g <sup>-1</sup> , 2-4.3V ( $Q_{Th} = 130$ mA h g <sup>-1</sup> )       | This work |

**Table S3** CV at various scan rates tests were employed to analyze the Na-migration kinetics of the NVPOF electrode to the Randles–Sevcik equation, and the  $D_{app,Na}$  values.

|    | pH=5      | pH=6      | pH=7      | pH=8      |
|----|-----------|-----------|-----------|-----------|
| A1 | 3.71 E-11 | 1.18 E-10 | 2.56 E-10 | 1.64 E-10 |
| A2 | 1.94 E-11 | 4.65 E-11 | 1.48E-10  | 7.27 E-11 |
| C1 | 2.21 E-11 | 6.88 E-11 | 1.75 E-10 | 1.07 E-10 |
| C2 | 7.87 E-12 | 1.51E-11  | 2.98 E-11 | 2.75 E-11 |

Calculation process for the apparent Na chemical diffusion coefficients through CV tests

The apparent Na diffusion coefficient ( $D_{app,Na}$ ) was calculated from the following Randles-Sevcik equation S1:<sup>11</sup>

$$i_p = 2.69 \times 10^5 n^{3/2} A D_{app,Na}^{1/2} C_0 \nu^{1/2} \quad (S1)$$

where  $i_p$  is the peak current density,  $n$  is the electron-transfer number per molecule formula during the redox reaction ( $n=2$  for the present NVPOF),<sup>12</sup>  $A$  is the surface area of the electrode,  $C_0$  is the concentration of Na ions in the electrode ( $7.7 \text{ mmol cm}^{-3}$ ),<sup>13</sup> and  $\nu$  is the scan rate.

Calculation process for the apparent Na chemical diffusion coefficients through GITT tests.

The  $D_{app,Na}$  values can be calculated according to the following equation S2:<sup>14</sup>

$$D_{app,Na} = \frac{4}{\pi \tau} \left( \frac{m_B V_M}{M_B S} \frac{\Delta E_s}{\Delta E \tau} \right)^2 \quad (S2)$$

where  $m_B$ ,  $M_B$ , and  $V_M$  are the mass, molecular weight, and molar volume of the NVPOF material, respectively;  $\tau$  is the time for an applied galvanostatic current;  $S$  is the active surface of the electrode;  $L$  is the average radius of the material particles; and  $\Delta E_s$  and  $\Delta E \tau$  are the quasi-equilibrium potential and the change of cell voltage  $E$  during the current pulse, respectively.

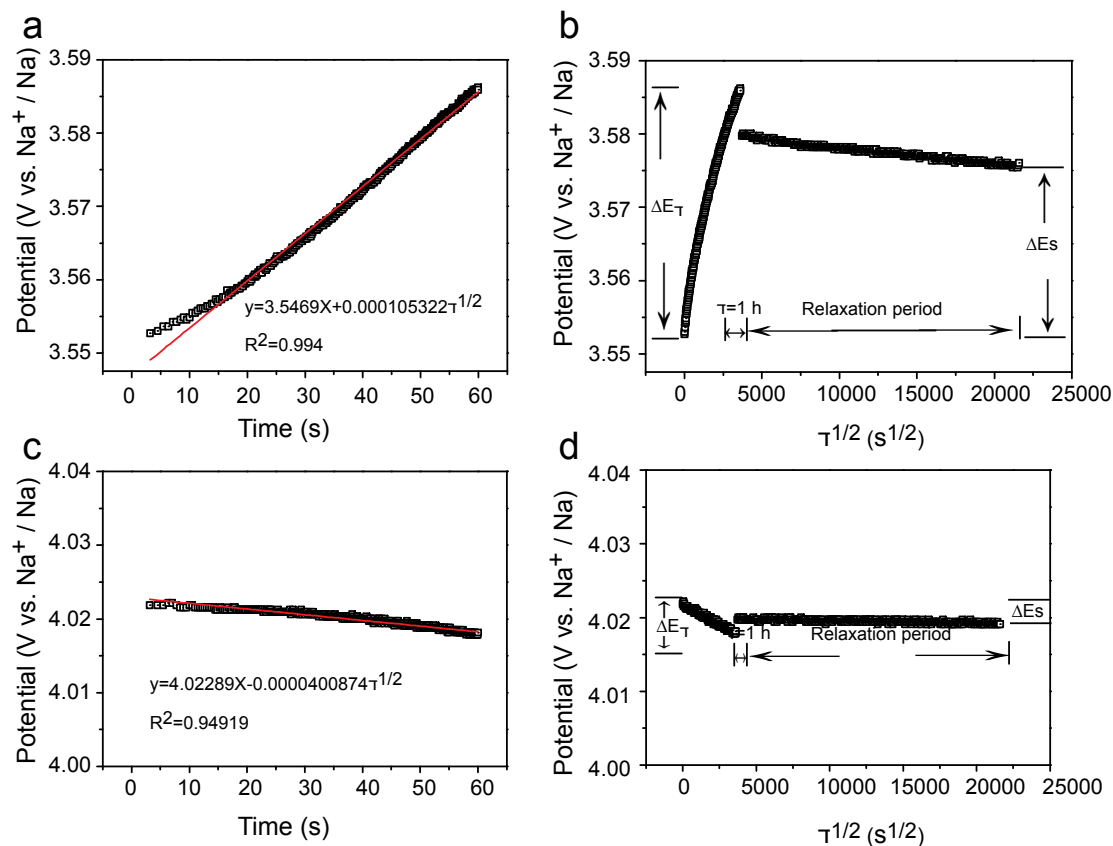

**Figure S5.** A single GITT profile for charge and discharge process.  $\tau$  vs  $E$  profile for a single GITT titration during (b) charge and (d) discharge processes. The corresponding linearly fitting behavior of  $E$  vs  $\tau^{1/2}$  for the (a) charge and (c) discharge GITT titration.



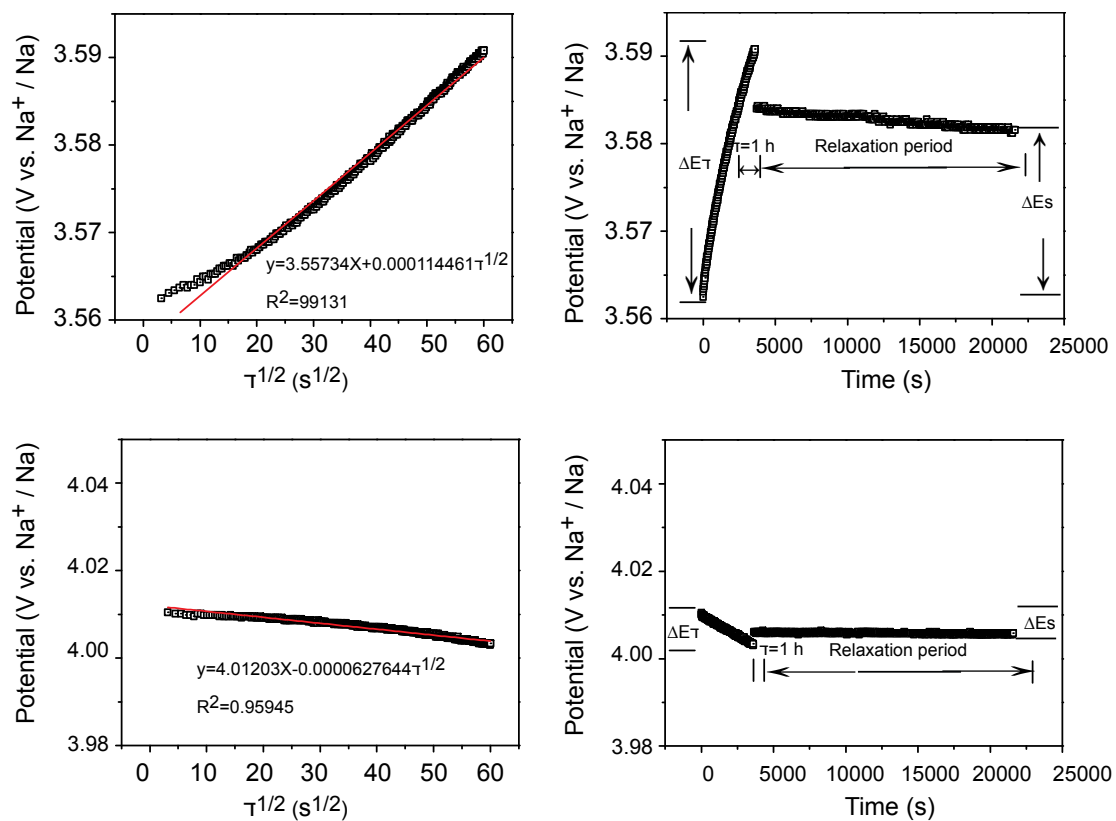

**Figure S6.** A single GITT profile for charge and discharge processes.  $\tau$  vs  $E$  profile for a single GITT titration during (b) charge and (d) discharge processes. The corresponding linearly fitting behavior of  $E$  vs  $\tau^{1/2}$  for the (a) charge and (c) discharge GITT titration.



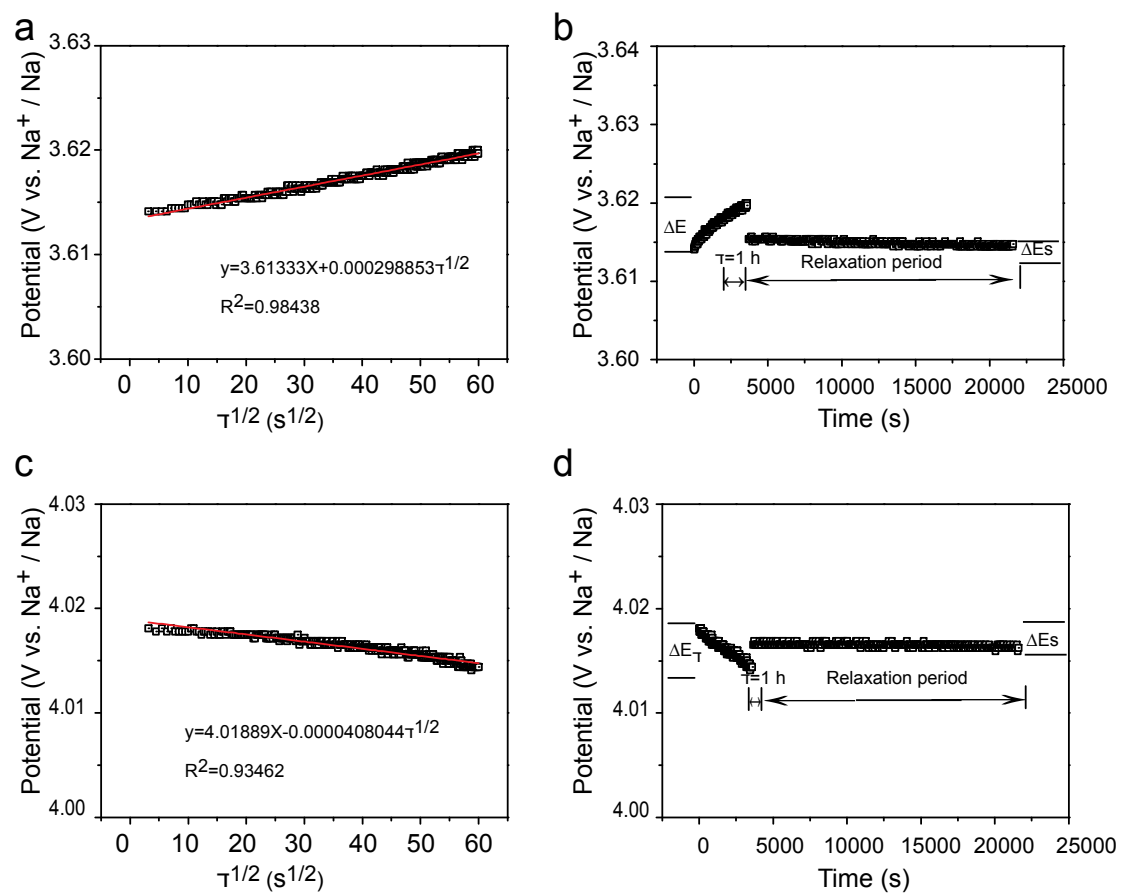

**Figure S7.** A single GITT profile for charge and discharge process.  $\tau$  vs  $E$  profile for a single GITT titration during (b) charge and (d) discharge processes. The corresponding linearly fitting behavior of  $E$  vs  $\tau^{1/2}$  for the (a) charge and (c) discharge GITT titration.

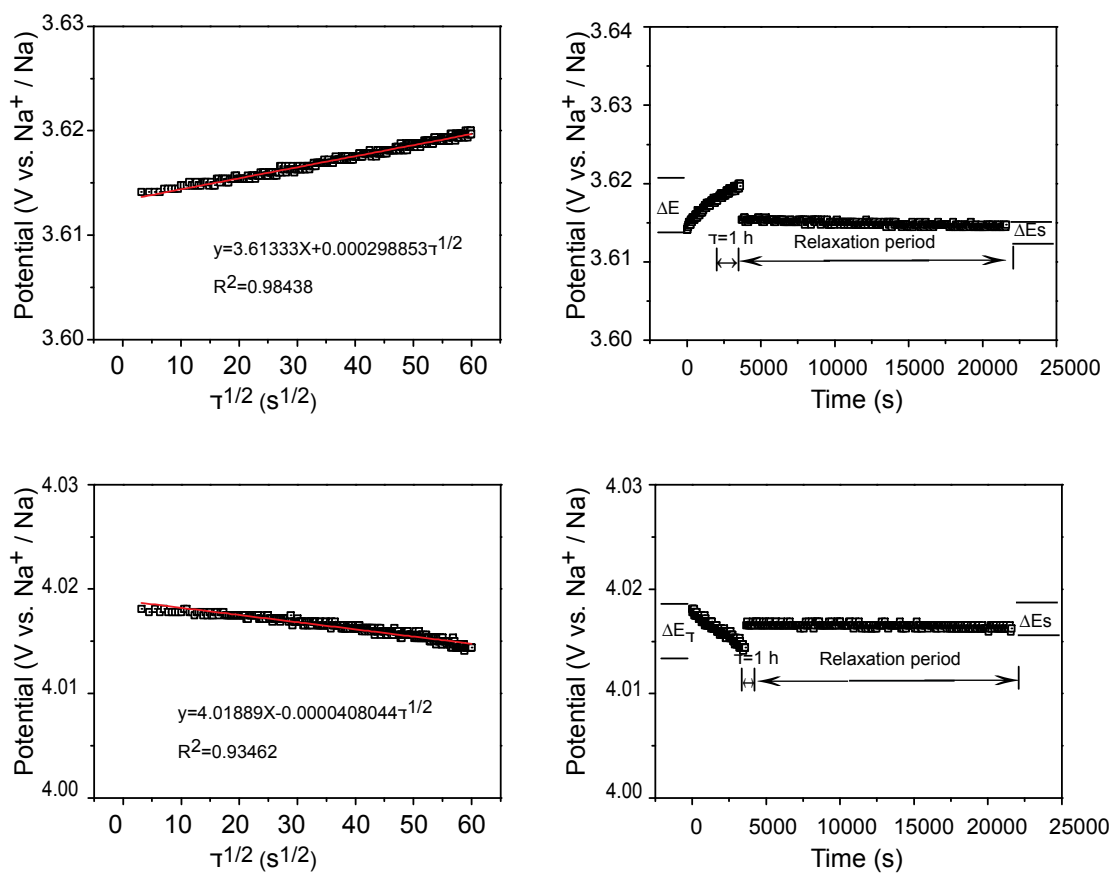

**Figure S8.** A single GITT profile for charge and discharge process.  $\tau$  vs  $E$  profile for a single GITT titration during (b) charge and (d) discharge processes. The corresponding linearly fitting behavior of  $E$  vs  $\tau^{1/2}$  for the (a) charge and (c) discharge GITT titration.

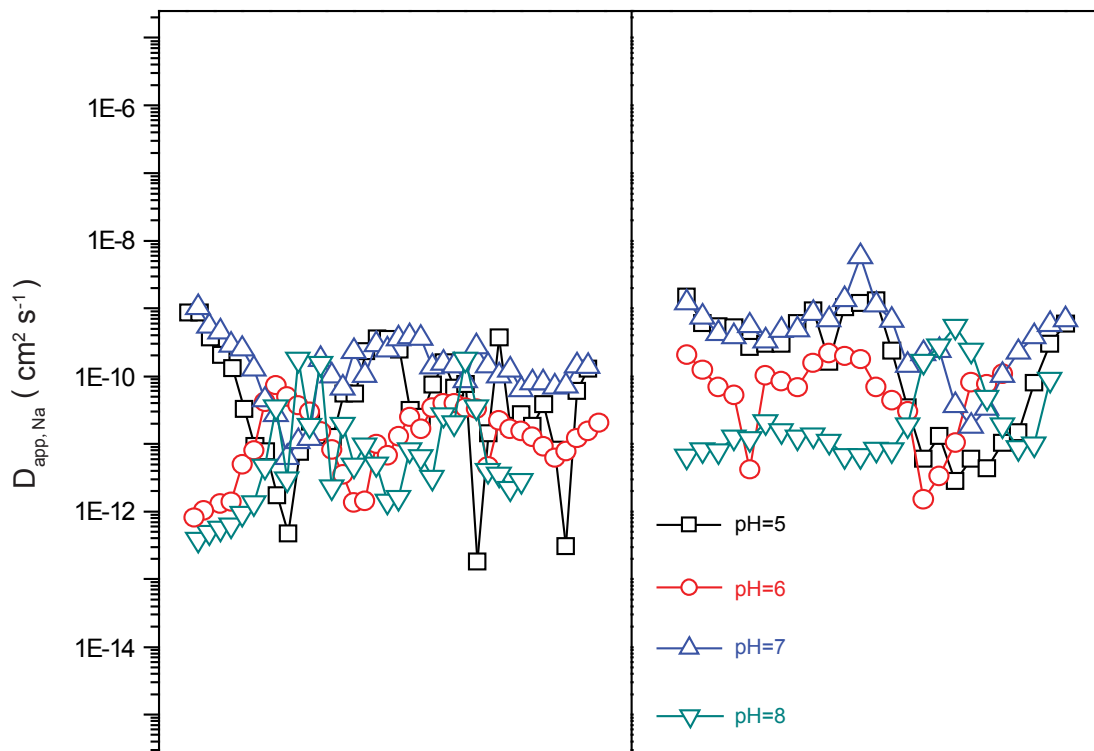

**Figure S9.** The comparison of  $D_{app,Na}$  values obtained from GITT tests for the NVPOF materials prepared under different pH (5, 6, 7 and 8) at 170 °C.

## ESI References

1. Q. Hu, T. Y. Liao, and C. H. Chen, *J. Mater. Chem. A.*, 2016, **4**, 16801-16804.
2. J. Barker, M. Y. Saidi, J. L. Swoyer, *Electrochem. Solid-State Lett.*, 2003, **6**, A1.
3. H. Zhou, X. Wang, A. Tang, Z. Liu, S. Gamboa, P. J. Sebastian, *J. Power Sources*, 2006, **160**, 698.
4. W. Song, X. Cao, Z. Wu, J. Chen, Y. Zhu, H. Hou, Q. Lan, X. Ji, *Langmuir*, 2014, **30**, 12438.
5. P. Serras, V. Palomares, A. Goni, I. Gil de Muro, P. Kubiak, L. Lezama, T. Rojo, *J. Mater. Chem.*, 2012, **22**, 22301.
6. M. Xu, L. Wang, X. Zhao, J. Song, H. Xie, Y. Lu, J. B. Goodenough, *Phys. Chem. Chem. Phys.*, 2013, **15**, 13032.
7. Y. Kawabe, N. Yabuuchi, M. Kajiyama, N. Fukuhara, T. Inamasu, R. Okuyama, I. Nakai, S. Komaba, *Electrochem. Commun.*, 2011, **13**, 1225.
8. S.-W. Kim, D.-H. Seo, H. Kim, K.-Y. Park, K. Kang, *Phys. Chem. Chem. Phys.*,

- 2012, **14**, 3299.
- 9 . K. Kubota, K. Yokoh, N. Yabuuchi, S. Komaba, *Electrochem.*, 2014, **82**, 909.
- 10 . P. Barpanda, J.-N. Chotard, N. Recham, C. Delacourt, M. Ati, L. Dupont, M. Armand, J.-M. Tarascon, *Inorg. Chem.*, 2010, **49**, 7401.
- 11 . K. Tang, X. Yu, J. Sun, H. Li, X. Huang, *Electrochim. Acta*, 2011, **56**, 4869.
- 12 . P. R. Kumar, Y. H. Jung, J. E. Wang, D. K. Kim, *J. Power Sources*, 2016, **324**, 421.
- 13 . W. Massa, O. V. Yakubovich, O. V. Dimitrova, *Solid State Sci.*, 2002, **4**, 495.
- 14 . S. Guo, H. Yu, Z. Jian, P. Liu, Y. Zhu, X. Guo, M. Chen, M. Ishida, H. Zhou, *ChemSusChem*, 2014, **7**, 2115.
